# Supplementary material
Source: publisher site journal article supplement (https://natureconservation.pensoft.net/article/73710/download/suppl/33/)
Supplement: Supplementary file 1

*Table S4: Robustness of the final risk map, estimated by removal of one of the bird information layers.*

| Reduced Risk Map | % of the original top 10 percentile most dangerous grid cells also classifies as most dangerous in the risk map |
| --- | --- |
| Reduced risk map (no colonies) | 86.4 |
| Reduced risk map (no geese) | 89.5 |
| Reduced risk map (no migration) | 90.1 |
| Reduced risk map (no plover) | 89.4 |
| Reduced risk map (no rare birds) | 81.6 |
| Reduced risk map (no roosts) | 84.8 |
| Reduced risk map (no waterbirds) | 85.5 |
| Reduced risk map (no widespread birds) | 88.4 |
